# Supplementary material
Source: PubMed Central journal article supplement (PMC3956678)
Supplement: NIHMS410960-supplement-12021_2012_9165_MOESM1_ESM.pdf [file NIHMS410960-supplement-12021_2012_9165_MOESM1_ESM.pdf]

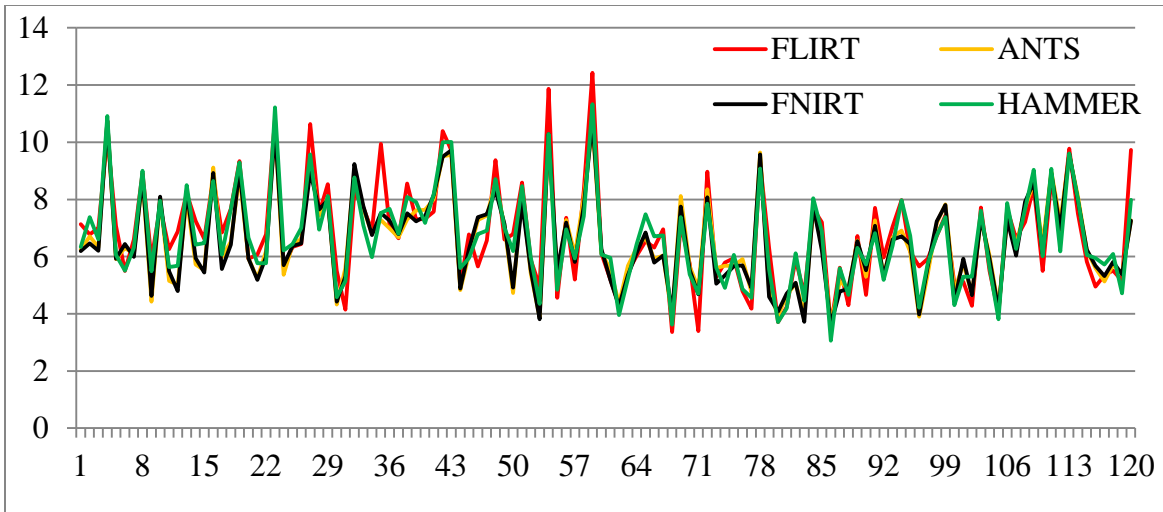

(a)

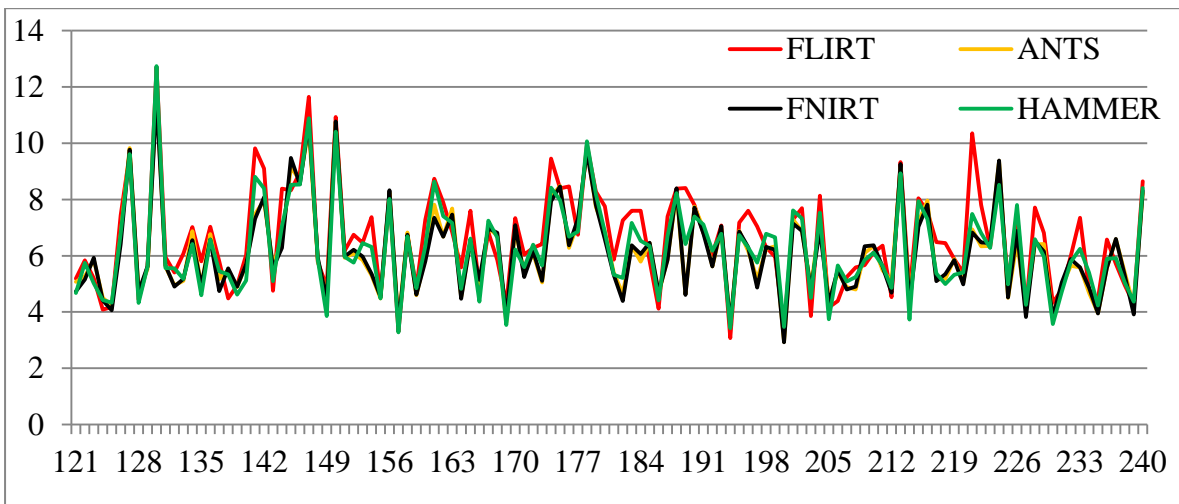

(b)

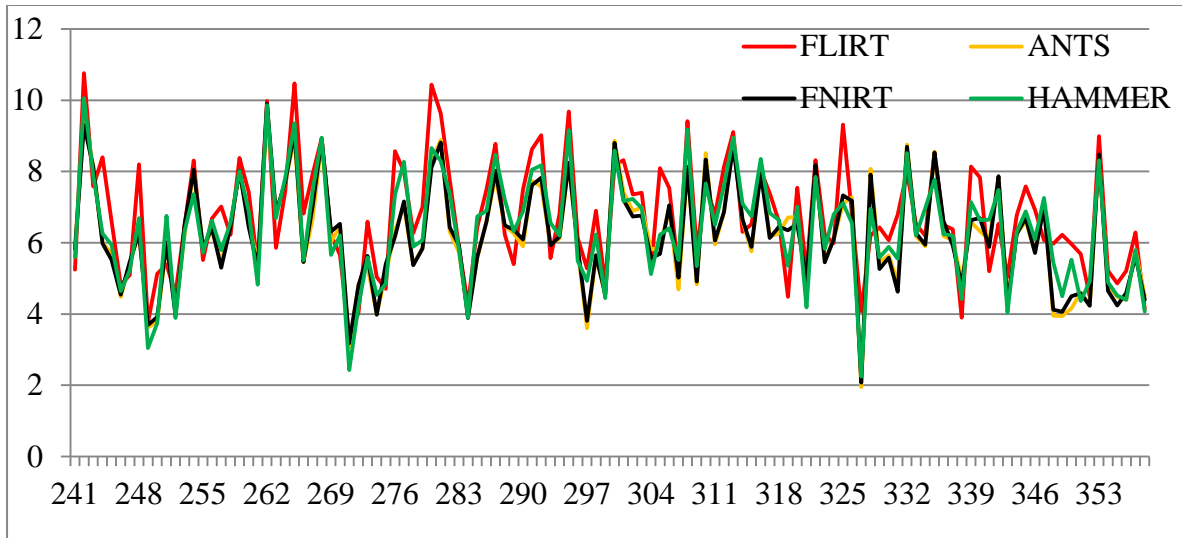

(c)

**Supplemental Figure 1.** Comparisons of four MRI image registration methods. The 358 DICCCOLs are split into three panels ((a)-(c)), in which each of the registration method's error is represented by a colored curve.

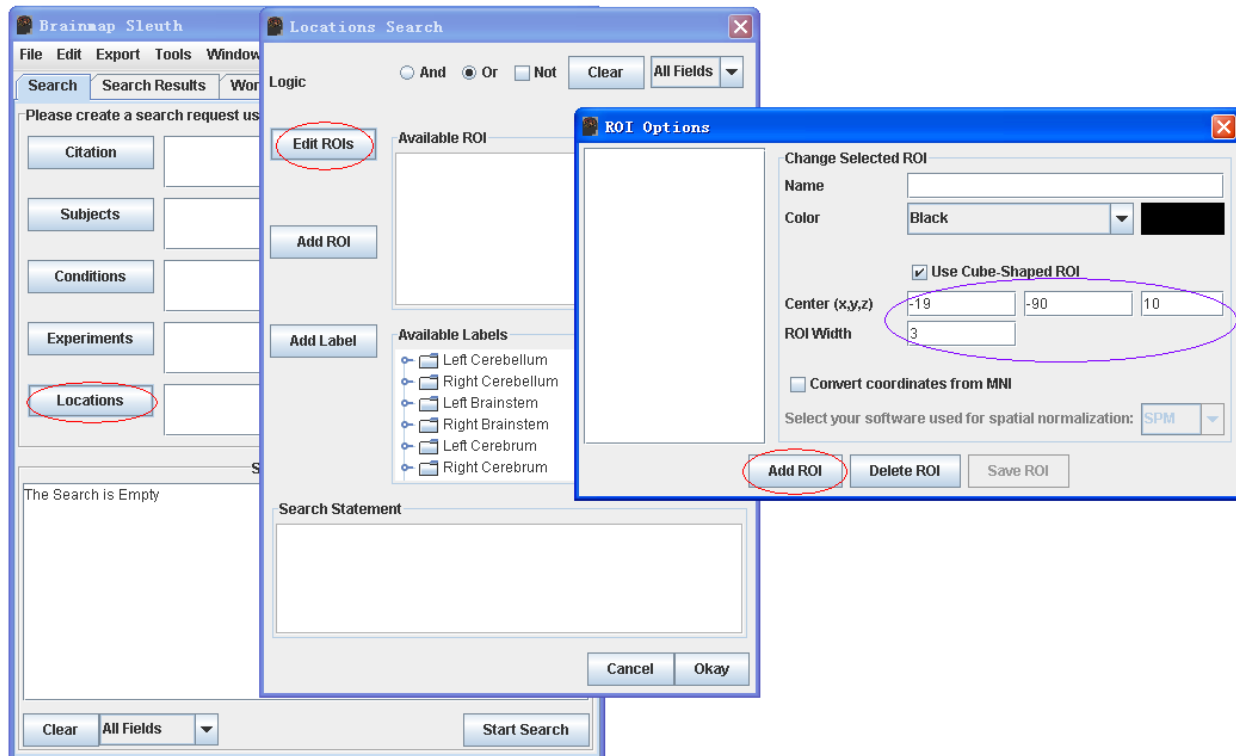

**Supplemental Figure 2.** Illustration of the BrainMap search using Sleuth.

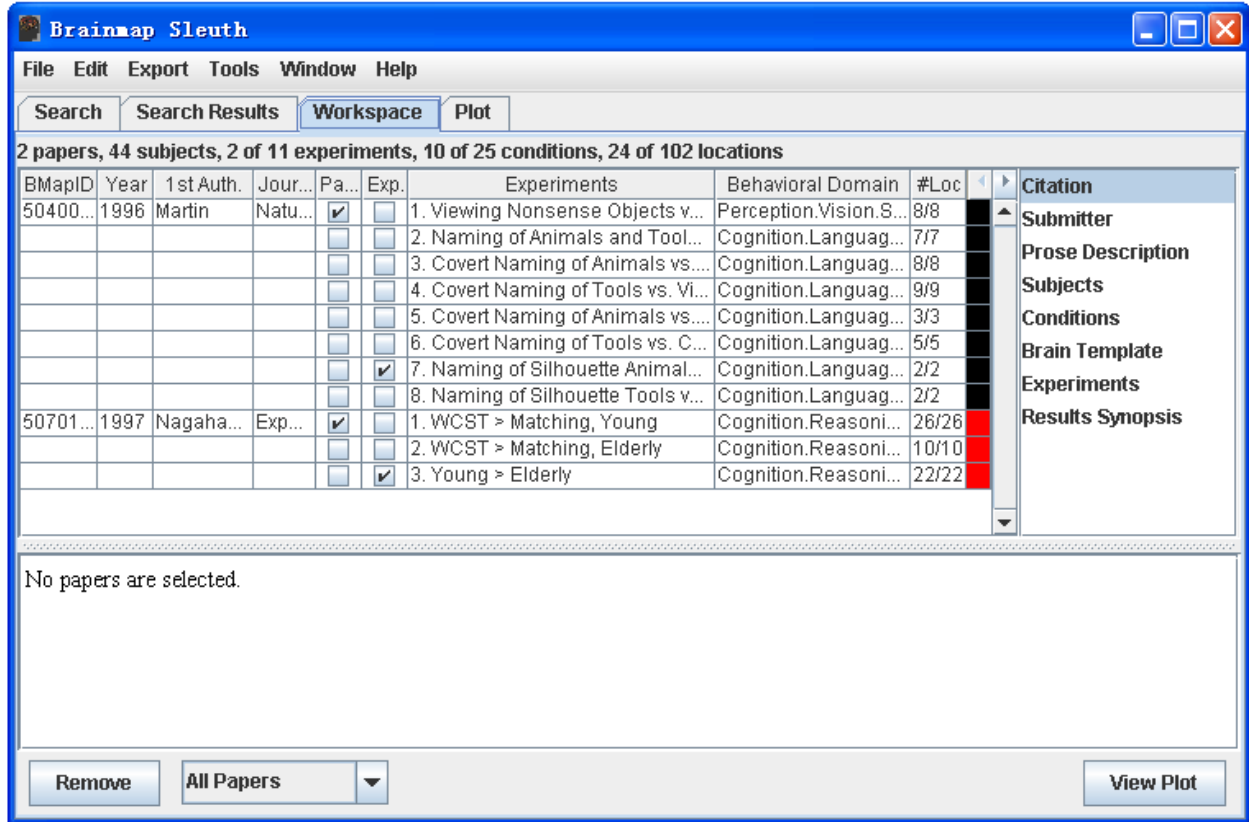

**Supplemental Figure 3.** The screenshot of the search results by Sleuth for the first DICCCOL.

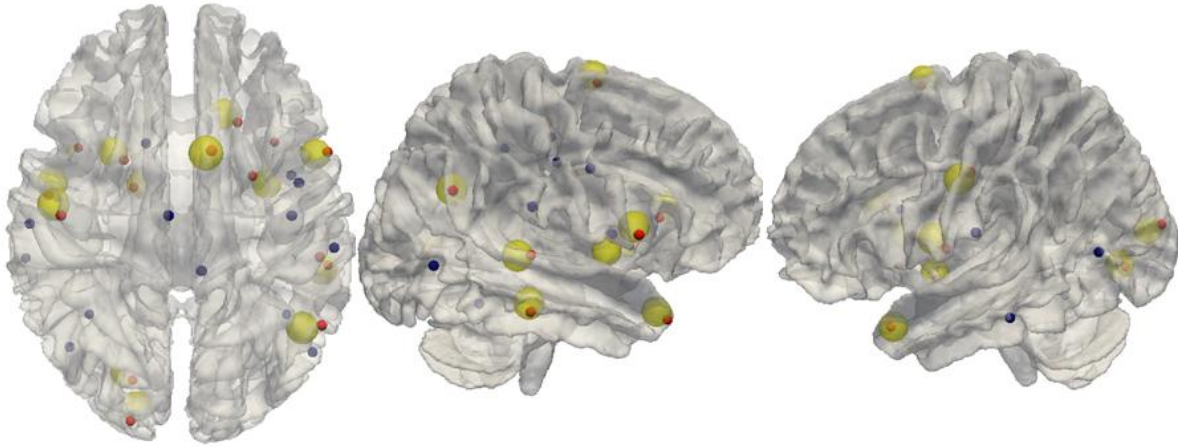

**Supplemental Figure 4.** The representation of fMRI activation foci by DICCCOLs. The red spheres show the fMRI activation foci that can be represented by DICCCOLs (yellow sphere with 8 mm neighborhood). The blue spheres represent fMRI foci that cannot be represented by DICCCOLs.

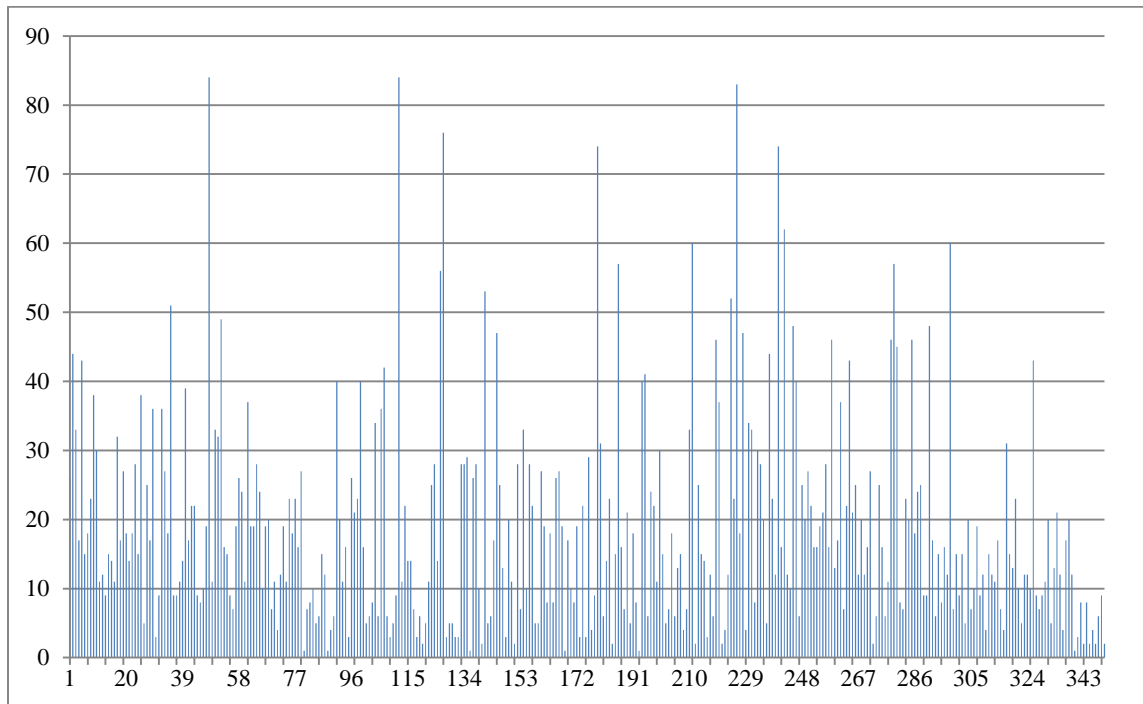

**Supplemental Figure 5.** The histogram of the numbers of functional networks associated with DICCCOLs. The horizontal axis represents the DICCCOL index (from 1 to 358), while the vertical axis is the number of functional networks associated with each ROI. The index of DICCCOLs in the surface are shown in Figure 5.

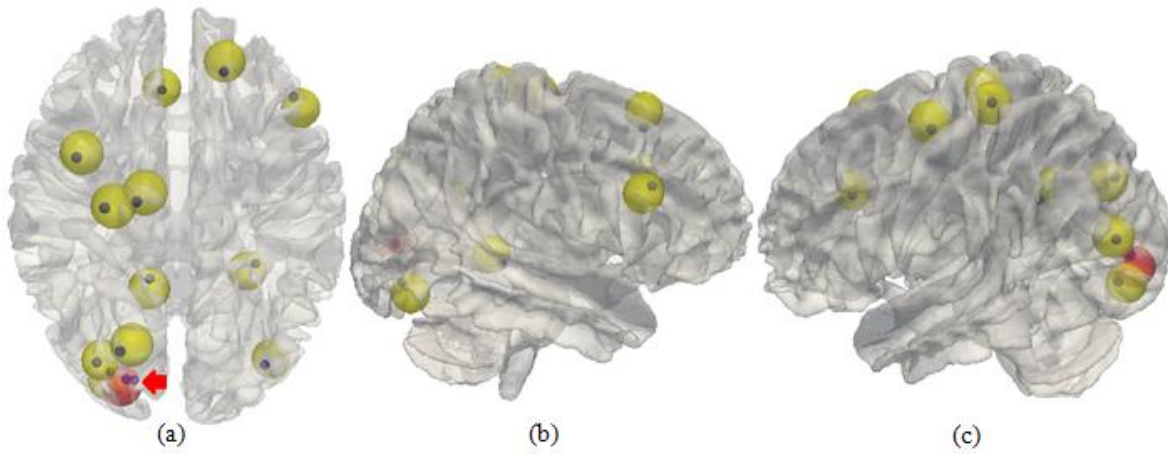

**Supplemental Figure 6.** The duplicate functional roles for DICCCOL #9 (red sphere) in the fMRI experiment. Yellow spheres represent DICCCOLs with 8 mm neighborhood. The blue spheres show the fMRI activation foci in the experiments.

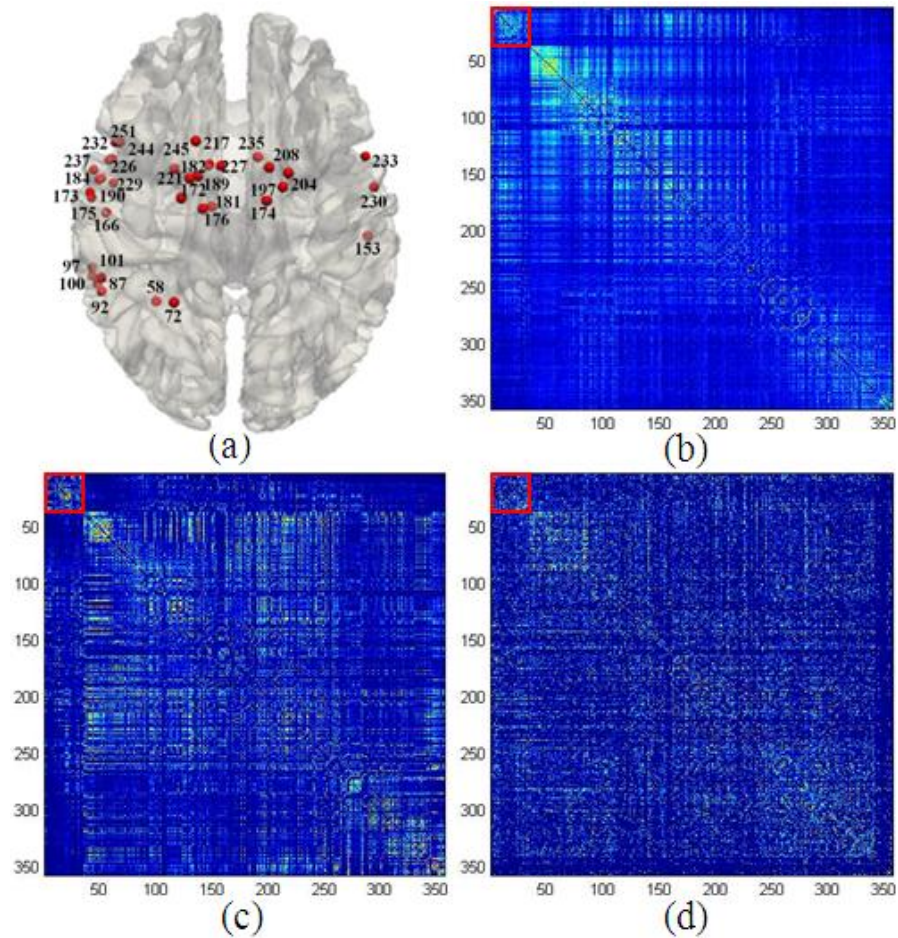

**Supplemental Figure 7.** (a) Visualization of the distribution of DICCCOLs in cluster #1 on the cortical surface. The DICCCOL IDs are labeled around the red bubbles. (b) The resting state connectivity. (c) The DTI-derived structural connectivity. (d) Functional connectivity matrix derived from the co-activations reported in the BrainMap database.



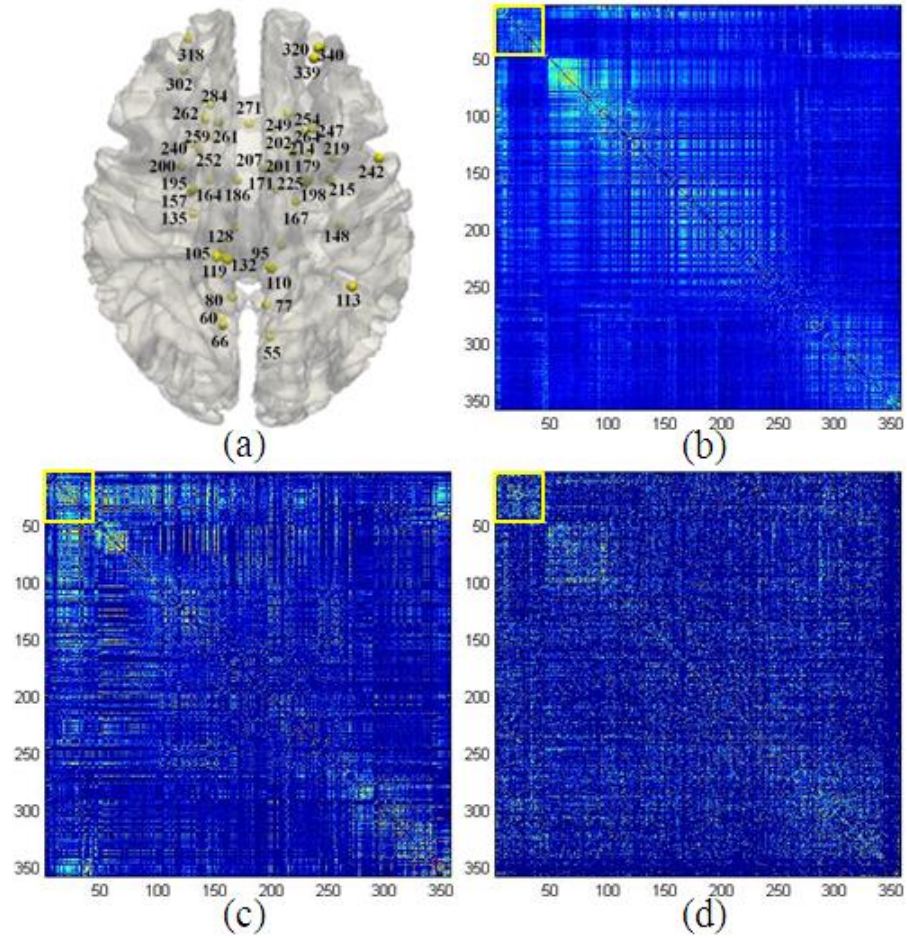

**Supplemental Figure 8.** (a) Visualization of the DICCCOLs of functional networks in cluster #2. The DICCCOL IDs are labeled around the yellow bubbles. (b) The resting state connectivity. (c) The DTI-derived structural connectivity. (d) Functional connectivity matrix derived from the co-activations reported in the BrainMap database.

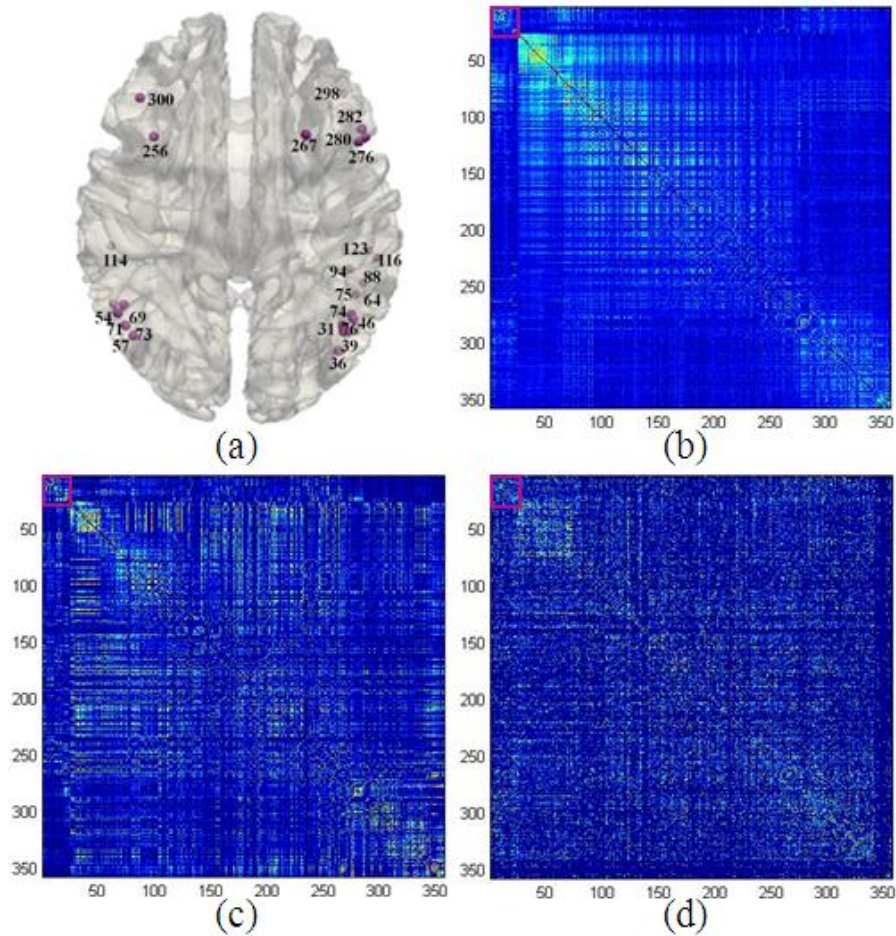

**Supplemental Figure 9.** (a) The representation of DICCCOLs in cluster #3 on the cortical surface. The DICCCOL IDs are labeled around the purple bubbles. (b) The resting state connectivity. (c) The DTI-derived structural connectivity. (d) Functional connectivity matrix derived from the co-activations reported in the BrainMap database.

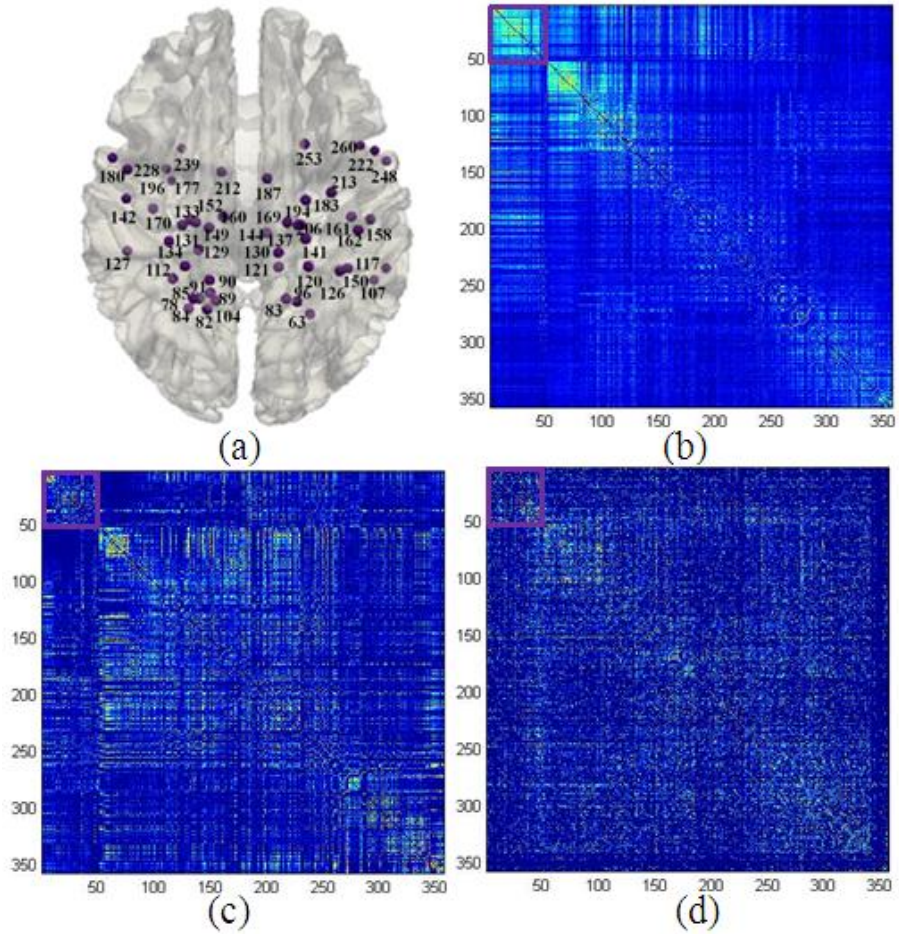

**Supplemental Figure 10.** (a) Visualization of the DICCCOLs in cluster #5 on the cortical surface. The DICCCOL IDs are labeled around the blue bubbles. (b) The resting state connectivity. (c) The DTI-derived structural connectivity. (d) Functional connectivity matrix derived from the co-activations reported in the BrainMap database.

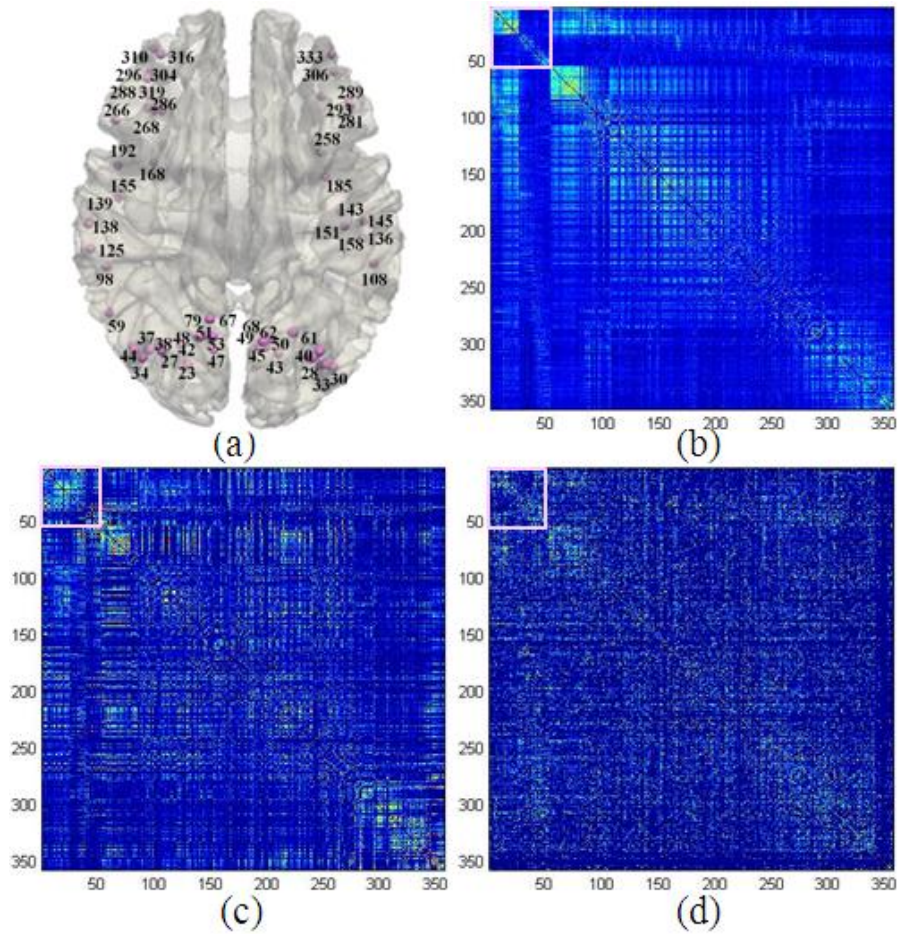

**Supplemental Figure 11.** (a) Visualization of the DICCCOLs in cluster #8 on cortical surface. The DICCCOL IDs are labeled around the pink bubbles. (b) The resting state connectivity. (c) The DTI-derived structural connectivity. (d) Functional connectivity matrix derived from the co-activations reported in the BrainMap database.

**Supplemental Table 1.** The large-scale 1110 (publications)  $\times$  358 (DICCCOL IDs) matrix. It is available online at: [http://www.cs.uga.edu/~tliu/Supplemental\\_Table\\_1.xlsx](http://www.cs.uga.edu/~tliu/Supplemental_Table_1.xlsx)

**Supplemental Table 2.** The distances (in mm) of 15 warped working memory ROIs by four image registration methods (FLIRT, ANTS, FNIRT, and HAMMER) to the benchmark data.

| <b>Brain Regions</b>           | <b>FLIRT</b> | <b>ANTS</b> | <b>FNIRT</b> | <b>HAMMER</b> |
|--------------------------------|--------------|-------------|--------------|---------------|
| Left Insula                    | 4.28         | 4.15        | 4.03         | 4.24          |
| Left Medial Frontal Cortex     | 6.51         | 6.48        | 6.50         | 6.87          |
| Left Occipital Pole            | 5.91         | 5.88        | 5.84         | 5.07          |
| Left ParacingulateGyrus        | 5.47         | 5.49        | 5.44         | 5.80          |
| Left Precentral Gyrus          | 4.60         | 4.48        | 4.32         | 5.08          |
| Left Precuneus                 | 5.38         | 5.50        | 5.45         | 5.14          |
| Left Superior Frontal Gyrus    | 5.29         | 5.36        | 5.70         | 6.00          |
| Left Inferior Parietal Lobe    | 4.11         | 4.05        | 4.09         | 4.94          |
| Right Dorsolateral Prefrontal  | 7.14         | 7.30        | 7.92         | 7.81          |
| Right Insula                   | 4.05         | 3.82        | 4.22         | 3.54          |
| Right Lateral Occipital Gyrus  | 5.47         | 4.36        | 3.08         | 4.54          |
| Right ParacingulateGyrus       | 5.34         | 5.30        | 5.65         | 5.19          |
| Right Precuneus                | 5.44         | 5.61        | 4.84         | 5.95          |
| Right Superior Frontal Gyrus   | 6.88         | 6.04        | 5.83         | 6.05          |
| Right Inferior Parietal Lobule | 5.54         | 5.75        | 5.19         | 5.06          |
| Average                        | 5.42         | 5.37        | 5.20         | 5.48          |

**Supplemental Table 3.** The representation procedure of associating fMRI activation foci to DICCCOLs.

The brain behavior of this fMRI experiment functional network #6) is Action.Execution and Emotion.Happiness. The fMRI activations in red can be associated with DICCCOLs, while others in black cannot be associated with any DICCCOL using 8 mm as the threshold in this fMRI experiment.

| Index | Original activation foci in fMRI experiment | Corresponding DICCCOL coordinates | Corresponding DICCCOL index | Distance (mm) |
|-------|---------------------------------------------|-----------------------------------|-----------------------------|---------------|
| 1     | (46,111,112)                                | (43,115,110)                      | 142                         | 5.39          |
| 2     | (130,111,110)                               | (137,107,116)                     | 158                         | 10.05         |
| 3     | (133,123,106)                               | (144,122,107)                     | 230                         | 11.09         |
| 4     | (38,119,84)                                 | (40,124,87)                       | 190                         | 6.16          |
| 5     | (32,108,93)                                 | (32,118,96)                       | 173                         | 10.44         |
| 6     | (147,136,81)                                | (142,135,83)                      | 222                         | 5.48          |
| 7     | (100,133,133)                               | (98,132,136)                      | 235                         | 3.74          |
| 8     | (85,111,112)                                | (80,125,120)                      | 212                         | 16.88         |
| 9     | (97,91,113)                                 | (97,102,131)                      | 144                         | 21.10         |
| 10    | (141,71,109)                                | (134,70,108)                      | 75                          | 7.14          |
| 11    | (147,99,99)                                 | (144,88,106)                      | 107                         | 13.38         |
| 12    | (46,140,47)                                 | (46,139,47)                       | 246                         | 1.00          |
| 13    | (130,143,39)                                | (132,139,44)                      | 241                         | 6.71          |
| 14    | (26,94,62)                                  | (34,96,60)                        | 114                         | 8.49          |
| 15    | (46,60,82)                                  | (37,70,84)                        | 59                          | 13.60         |
| 16    | (144,95,80)                                 | (145,90,81)                       | 108                         | 5.19          |
| 17    | (150,91,60)                                 | (149,91,63)                       | 116                         | 3.16          |
| 18    | (52,71,61)                                  | (51,89,55)                        | 124                         | 19.00         |
| 19    | (133,71,61)                                 | (140,75,62)                       | 64                          | 8.12          |
| 20    | (70,32,86)                                  | (72,37,83)                        | 1                           | 6.16          |
| 21    | (70,45,67)                                  | (67,48,69)                        | 5                           | 4.69          |
| 22    | (141,58,82)                                 | (130,49,81)                       | 24                          | 14.25         |
| 23    | (133,127,79)                                | (136,137,83)                      | 260                         | 11.18         |
| 24    | (76,139,86)                                 | (63,136,80)                       | 239                         | 14.63         |
| 25    | (112,148,76)                                | (106,151,79)                      | 249                         | 7.35          |
| 26    | (67,133,78)                                 | (63,136,80)                       | 239                         | 5.39          |
| 27    | (118,127,73)                                | (124,124,70)                      | 215                         | 7.35          |
| 28    | (70,123,58)                                 | (73,124,60)                       | 195                         | 3.74          |

**Supplemental Table 4.** The 20 randomly selected functional networks associated with the DICCCOL #48.

| <b>Network index</b> | <b>Brain domain</b>                            | <b>Network index</b> | <b>Brain domain</b>                                       |
|----------------------|------------------------------------------------|----------------------|-----------------------------------------------------------|
| 16                   | Cognition, Emotion                             | 88                   | Cognition                                                 |
| 33                   | Cognition.Language.Orthography                 | 114                  | Cognition.Attention, Perception.Vision                    |
| 34                   | Cognition.Language.Orthography                 | 164                  | Action.Motor Learning                                     |
| 35                   | Cognition.Time, Cognition.Language.Orthography | 165                  | Cognition.Attention, Perception.Vision.Motion             |
| 38                   | Cognition.Attention, Perception.Vision.Motion  | 167                  | Perception.Vision.Shape, Pharmacology.Alcohol, Cognition. |
| 40                   | Cognition.Language.Orthography                 | 175                  | Cognition, Emotion                                        |
| 41                   | Cognition.Time, Cognition.Language.Orthography | 347                  | Action.Motor Learning                                     |
| 42                   | Cognition.Attention                            | 363                  | Cognition, Emotion, Cognition.Memory.Explicit             |
| 43                   | Cognition.Attention, Perception.Vision.Motion  | 402                  | Cognition.Language.Phonology                              |
| 70                   | Cognition.Memory.Explicit                      | 452                  | Emotion                                                   |

**Supplemental Table 5.** The top 20 DICCCOL ROIs with the largest number of networks.

| DICCCOL index | Brodman areas                                              | Number of networks | DICCCOL index | Brodman areas                                                      | Number of networks |
|---------------|------------------------------------------------------------|--------------------|---------------|--------------------------------------------------------------------|--------------------|
| 48            | Brodman area 7                                             | 84                 | 281           | Brodman area 9                                                     | 57                 |
| 113           | Brodman area 40                                            | 84                 | 127           | Brodman area 40                                                    | 56                 |
| 228           | Brodman area 4                                             | 83                 | 142           | Brodman area 4                                                     | 53                 |
| 128           | Left Cerebrum. Sub-lobar. Thalamus. Gray Matter. Pulvinar, | 76                 | 226           | Brodman area 3                                                     | 52                 |
| 180           | Brodman area 6                                             | 74                 | 35            | Brodman area 18                                                    | 51                 |
| 242           | Brodman area 6                                             | 74                 | 52            | Brodman area 19                                                    | 49                 |
| 244           | Brodman area 9                                             | 62                 | 247           | Right Cerebrum. Sub-lobar. Lentiform Nucleus. Gray Matter. Putamen | 48                 |
| 213           | Brodman area 6                                             | 60                 | 293           | Brodman area 46                                                    | 48                 |
| 300           | Brodman area 9                                             | 60                 | 146           | Brodman area 22                                                    | 47                 |
| 187           | Brodman area 6                                             | 57                 | 230           | Brodman area 6                                                     | 47                 |

**Supplemental Table 6.** The bottom 30 DICCCOLs with the least numbers of associated functional networks.

| ROI index | Num of networks | Brodman areas                                                  | ROI index | Num of networks | Brodman areas    |
|-----------|-----------------|----------------------------------------------------------------|-----------|-----------------|------------------|
| 133       | 3               | Brodman area 4                                                 | 149       | 3               | Brodman area 4   |
| 174       | 3               | .Brodman area 6                                                | 218       | 3               | .Brodman area 38 |
| 344       | 3               | Brodman area 11                                                | 274       | 2               | Brodman area 6   |
| 358       | 2               | Brodman area 10                                                | 121       | 2               | Brodman area 4   |
| 141       | 2               | Brodman area 3                                                 | 152       | 2               | Brodman area 4   |
| 185       | 2               | Right Cerebrum. Sub-lobar. Claustrum. Gray Matter.             | 214       | 2               | Brodman area 34  |
| 223       | 2               | Brodman area 21                                                | 346       | 2               | Brodman area 10  |
| 351       | 2               | Brodman area 10                                                | 354       | 2               | .Brodman area 10 |
| 81        | 1               | Brodman area 30                                                | 89        | 1               | .Brodman area 7  |
| 137       | 1               | Brodman area 4                                                 | 169       | 1               | Brodman area 6   |
| 194       | 1               | .Brodman area 43                                               | 343       | 1               | Brodman area 11  |
| 65        | 0               | Brodman area 30                                                | 206       | 0               | Brodman area 4   |
| 342       | 0               | Brodman area 10                                                | 348       | 0               | Brodman area 10  |
| 349       | 0               | .Brodman area 10                                               | 350       | 0               | Brodman area 10  |
| 352       | 0               | Left Cerebrum. Frontal Lobe. Medial Frontal Gyrus. Gray Matter | 357       | 0               | Brodman area 10  |

**Supplemental Table 7.** The supplemental table 7 can be downloaded at:

[http://www.cs.uga.edu/~tliu/Supplemental\\_Table\\_7.xlsx](http://www.cs.uga.edu/~tliu/Supplemental_Table_7.xlsx)
